# Supplementary material for: Optimizing Droplet Digital PCR for Environmental Samples
Source: Preprints.org preprint supplement (doi:10.20944/preprints202104.0299.v1), 2021-04-12
Supplement: Supplementary file 1 [file supplementary]

**Supplementary information for “Considerations for droplet digital PCR for environmental samples”**

**Table S1.** Web of Science (Clarivate Analytics 2018) search for environmental studies using ddPCR. For each study, the type of sample used, and the threshold determination method is reported.

| **Source** | **Type of sample** | **Threshold strategy** |
| --- | --- | --- |
| Kokkoris et al., 2021 | Fungal spores | Manual Quantasoft – Based on controls |
| Fu *et al.* 2020 | Seeds/grains | Auto Quantasoft (1.6.6) |
| Grudlewska *et al.* 2020 | Sewage/wastewater | Manual Quantasoft – 7000-8000 RFU depending on assay |
| Suttner *et al. 2020* | Watershed sediment | Auto Quantasoft (1.7.4) |
| Rosa et al., 2020 | Roots | Manual Quantasoft – Based on controls |
| Maldonado-González et al., 2020 | Soil | Auto Quantasoft - Unspecified |
| Liu et al., 2020 | Soil | Define the rain algorithm |
| Wen et al., 2020 | Soil | Define the rain algorithm |
| Martínez-Diz et al., 2020 | Soil | Auto Quantasoft - Unspecified |
| Manzari et al., 2020 | Bacteria | Manual QuantaSoft - Unspecified |
| Hansen et al., 2019 | Soil | Unspecified |
| Kokkoris et al., 2019 | Soil/plant tissue | Manual Quantasoft – Based on controls |
| Köppel *et al.* 2019 | Meat tissue | Auto Quantasoft – Unspecified |
| Cao *et al.* 2019 | Fish muscle tissue | Auto Quantasoft (1.7) |
| Shehata *et al.* 2019 | Meat | Auto Quantasoft – Unspecified |
| Cottenet *et al.* 2019 | Plant tissue | Auto Quantasoft (1.7.4) |
| Deng *et al.* 2019 | Seeds | Manual Quantasoft – Unspecified |
| Mauvisseau *et al.* 2019 | Water | Manual Quantasoft – 3500 RFU |
| Giraldo *et al.* 2019 | Plant tissue | Auto Quantasoft – Unspecified |
| Bahar *et al.* 2018 | Plant tissue | Manual QuantaSoft - High |
| Cooley *et al.* 2018 | Surface water | Manual – BioRad Rare Mutation Detection guidelines |
| Gao *et al.* 2018 | Compost | Auto QuantaSoft |
| Gobert *et al.* 2018 | Faecal | Manual QuantaSoft- Low |
| Gradoville *et al.* 2018 | Seawater | Three standard deviations above average NTC RFU |
| Grelewska-Nowotko *et al.* 2018 | Plant tissue | Manual QuantaSoft - Unspecified |
| Hamaguchi *et al.* 2018 | Coastal sediment | Auto QuantaSoft |
| Köppel *et al.* 2018 | Plant and animal tissue | Auto QuantaSoft |
| Naaum *et al.* 2018 | Meat products | Auto QuantaSoft |
| Paternò *et al.* 2018 | Wheat | Manual QuantaSoft - Unspecified |
| Paquette *et al.* 2018 | Faecal | Auto QuantaSoft |
| Steele *et al.* 2018 | Water | Manual QuantaSoft - Low |
| Selvaraj *et al.* 2018 | Plant tissue | Auto QuantaSoft |
| Wang *et al.* 2018 | Meat products | Auto QuantaSoft |
| Zhong *et al.* 2018 | Plant tissue | Auto QuantaSoft |
| Boynton *et al.* 2017 | Leaf tissue | Manual QuantaSoft - Unspecified |
| van Dorssen *et al.* 2017 | Faecal | Auto QuantaSoft |
| Hunter *et al.* 2017 | Pond water | Manual QuantaSoft - Unspecified |
| King *et al.* 2017 | Insect tissue | Manual - Low |
| Košir *et al.* 2017 | Plant tissue | Manual QuantaSoft – 1600-18500 RFU depending on assay |
| Lee *et al.* 2017 | Seawater | Auto QuantaSoft |
| Maheshwari *et al.* 2017 | Plant tissue | Auto QuantaSoft |
| McMahon *et al.* 2017 | Beef, pork, plant tissue | Auto QuantaSoft |
| Perez-Lopez *et al.* 2017 | Plant tissue | Auto QuantaSoft |
| Perry and Lee 2017 | Wheat | RainDrop Sense |
| Ren *et al.* 2017 | Meat | Auto QuantaSoft |
| Shehata *et al.* 2017 | Meat | Auto QuantaSoft |
| Singh *et al.* 2017 | River sediment | Auto QuantaSoft |
| Yang *et al.* 2017b | Wastewater | Auto QuantaSoft |
| Yang *et al.* 2017c | Faecal | Auto QuantaSoft |
| Zink *et al.* 2017 | Insect tissue | definetherain |
| Bucher and Köppel 2016 | Rice | Auto QuantaSoft |
| Cavé *et al.* 2016 | Soils and organic residues | Auto QuantaSoft |
| Cremonesi *et al.* 2016 | Cheese | Auto QuantaSoft |
| Demeke *et al.* 2016 | Plant tissue | RainDrop |
| Dobnik *et al.* 2016 | Corn | Manual - Mid |
| Gao *et al.* 2016 | Potato | Auto QuantaSoft |
| Iwobi *et al.* 2016 | Plant tissue | Auto QuantaSoft |
| Jerde *et al.* 2016 | Water | Unspecified |
| Lievens *et al.* 2016 | Plant tissue | Auto QuantaSoft |
| Palumbo *et al.* 2016a | Soils | Unspecified |
| Palumbo *et al.* 2016b | Grapes | Auto QuantaSoft |
| Porcellato *et al.* 2016 | Milk | Manual QuantaSoft - 2000-2200 RFU |
| Simmons *et al.* 2016 | Water | Auto QuantaSoft |
| Zhao *et al.* 2016 | Plant tissue | Manual - Unspecified |
| Cao *et al.* 2015 | Water and Faecal | Auto QuantaSoft |
| Doi *et al.* 2015a | Water | Manual QuantaSoft - Unspecified |
| Doi *et al.* 2015b | Water | Manual QuantaSoft – 1100 RFU |
| Te *et al.* 2015 | Water | Manual QuantaSoft - 9000 or 5400 RFU depending on assay |
| Kim *et al.* 2014 | Soil | Auto QuantaSoft |
| Nathan *et al.* 2014 | Water | Manual QuantaSoft - Unspecified |
| Rački *et al.* 201 | Plant tissue | Auto QuantaSoft or manual at 7000 RFU |
| Yang *et al.* 2014 | Faecal | Auto QuantaSoft |
| Kelley *et al.* 2013 | Nostril swab | Auto QuantaSoft |
| Morisset *et al.* 2013 | Corn | Manual QuantaSoft- Unclear |
| Roberts *et al.* 2013 | Eye swabs | Custom Perl and R scripts |


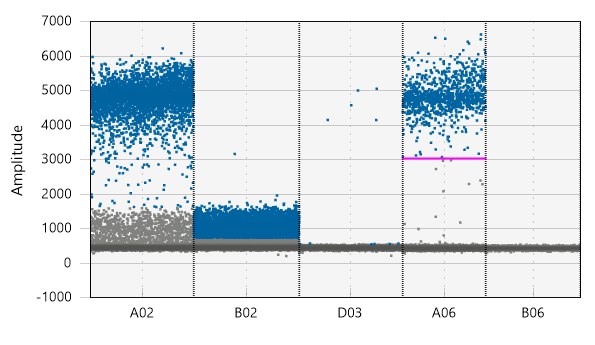


**Figure S1**. **A key to interpreting ddPCR output figures.** 1) Y axis represents the number of droplets amplified as a reflection of their fluorescence. Higher amplitude levels can be achieved with optimized cycling PCR protocol and optimized PCR reaction protocol. Higher amplitude levels result in improved cloud separation 2) X axis represents individual samples, in this example five individual samples are presented (A02, B02, D03, A06 and B06) and are named based on their location on the 96 well plate. 3) The cluster of high amplitude droplets (amplitude 4000 – 6000) is called “positive cloud” and represents positive to the target DNA droplets. 4 & 5) droplets between the “negative cloud” (see 10) and the “positive cloud” are called “rain” and may be negative or positive droplets. 6) Blue droplets are recognized as positive droplets from the automatic threshold determination system of the QuantaSoft software. While sample A02 and B02 are from a single ddPCR run, the automatic threshold treats each sample distinctly placing the “rain” as negative or “positive” respectively. 7) Low number of positive to the target DNA droplets. 8) Clean “negative cloud” 9) The pink line represents the manually set threshold. Above the line all droplets are considered as positive while bellow the line all droplets are considered as negative. 10) This sample represents a non-template control sample where there is no rain and no positive droplets. The negative cloud droplets cluster closely together creating a thick line at low amplitude. In theory, droplets that appear above this cloud in samples other that non-template controls can be potentially positive.

**Negative environmental**

**Positive control**

**Unknown environmental**

**NTC control**

**NTC control**

**NTC control**


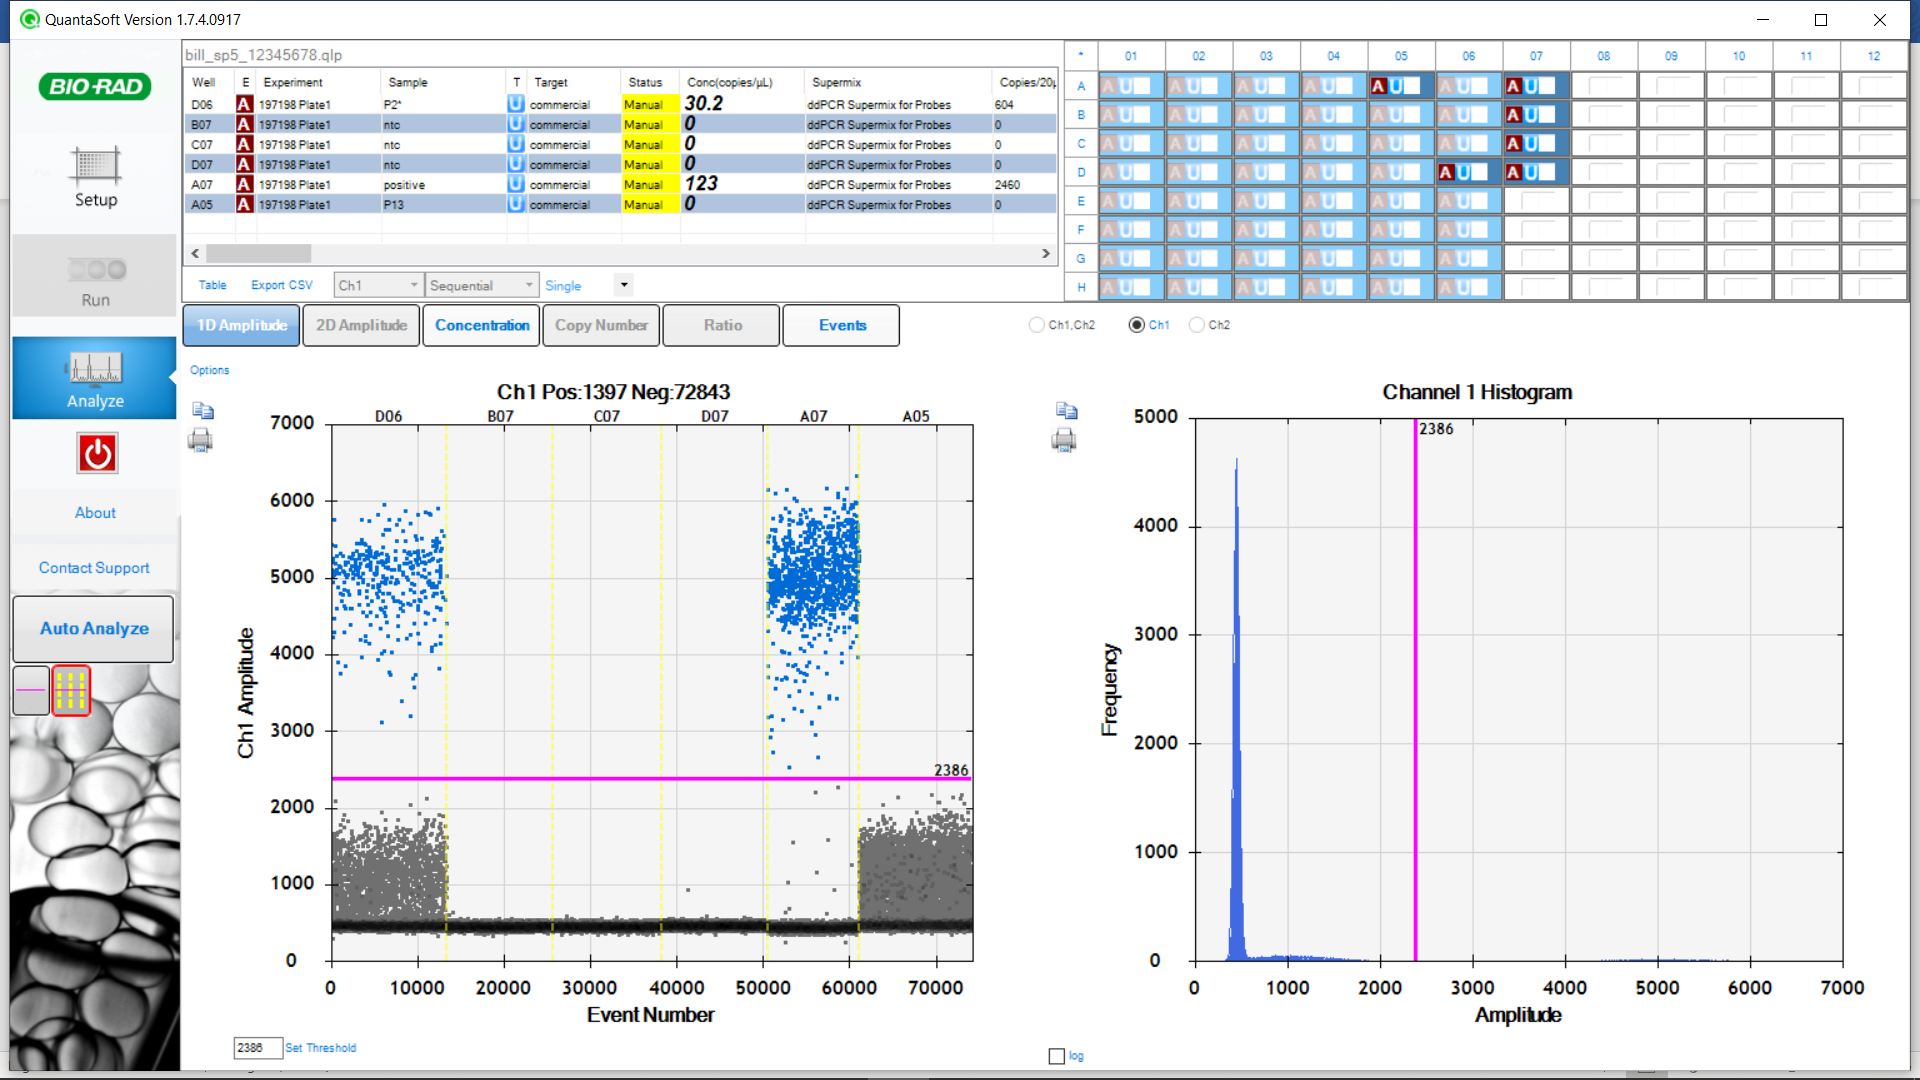


**Figure S2. Manual threshold determination.** In order to determine the quantity of target DNA in an unknown environmental sample (well D06) we used three NTCs (wells B07, C07, D07), an organismal positive control (well A07) and a negative environmental sample (well A05). The threshold (purple line) was set manually at amplitude of 2386 to include the positive droplet cloud produced by the organismal positive control but to exclude the droplets produced by the negative environmental samples. Blue droplets represent positive droplets while grey droplets represent negative droplets. Separation of negative from positive cloud was achieved by setting the threshold manually at “2386” amplitude.


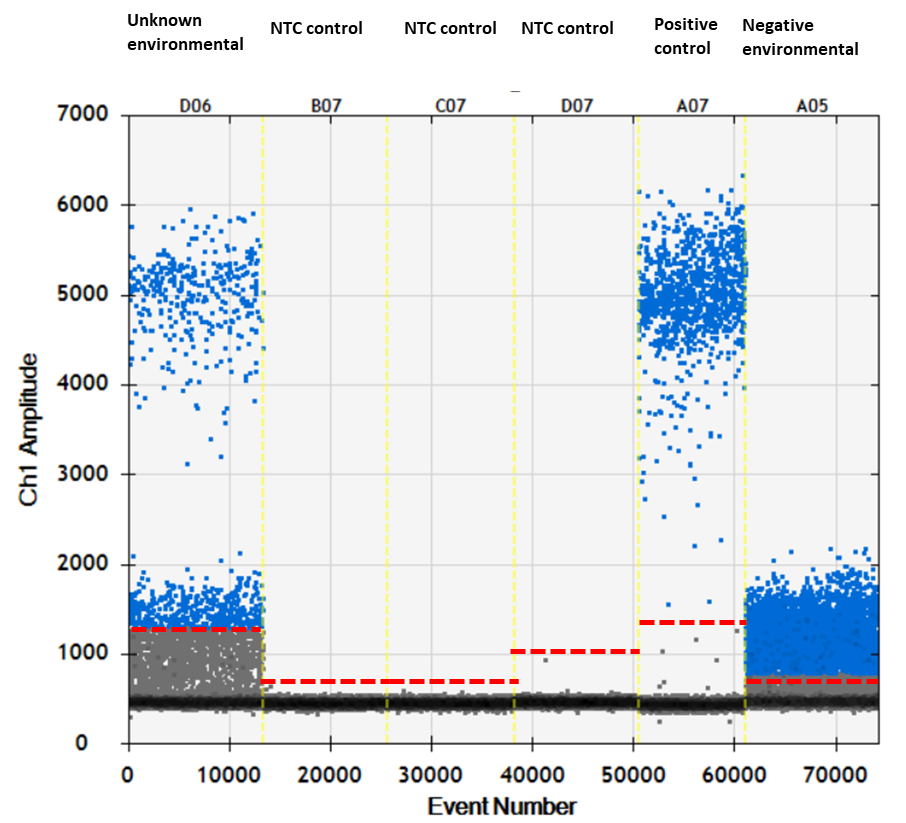


**Figure S3. Automatically determined threshold using the QuantaSoft® software.** Threshold was variable for each sample. The QuantaSoft® software algorithm failed to discriminate between true positive and negative droplets.Blue droplets represent positive droplets while grey droplets represent negative droplets.

NTC control

Positive control

Unknown environmental

Negative environmental


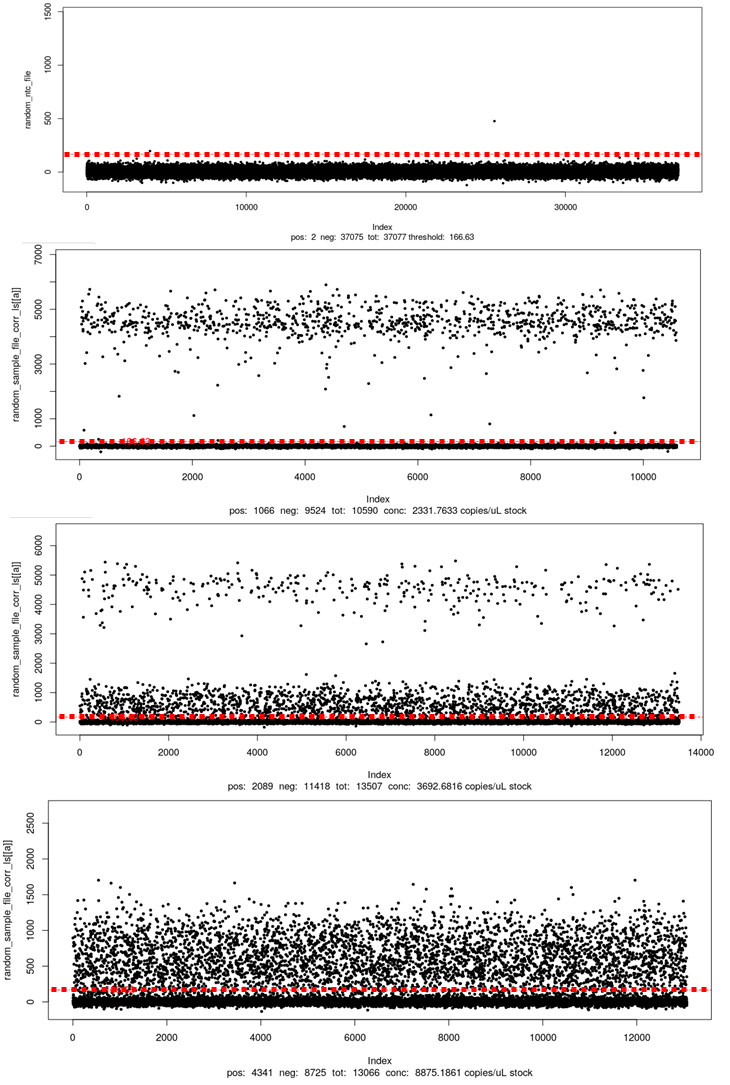


**Figure S4. Automatically determined threshold using the ‘ddPCRquant’ algorithm.** The ‘ddPCRquant’ algorithm merges the three NTC samples and calculates the threshold based on the dense negative droplet cloud. The threshold was set automatically at “166.63” amplitude (red line in each sample). All samples above this value were considered erroneously as positive, including the negative environmental sample.

**Supplementary References:**

Bahar, M.H., Wist, T.J., Bekkaoui, D.R., Hegedus, D.D., Olivier, C.Y., 2018. Aster leafhopper survival and reproduction, and Aster yellows transmission under static and fluctuating temperatures, using ddPCR for phytoplasma quantification. Sci. Rep. 8, 227. https://doi.org/10.1038/s41598-017-18437-0

Boynton, P.J., Stelkens, R., Kowallik, V., Greig, D., 2017. Measuring microbial fitness in a field reciprocal transplant experiment. Mol. Ecol. Resour. 17, 370–380. https://doi.org/10.1111/1755-0998.12562

Bucher, T.B., Köppel, R., 2016. Duplex digital droplet PCR for the determination of non-Basmati rice in Basmati rice (Oryza sativa) on the base of a deletion in the fragrant gene. Eur. Food Res. Technol. 242, 927–934. https://doi.org/10.1007/s00217-015-2599-3

Cao, Y., Raith, M.R., Griffith, J.F., 2015. Droplet digital PCR for simultaneous quantification of general and human-associated fecal indicators for water quality assessment. Water Res. 70, 337–349. https://doi.org/10.1016/j.watres.2014.12.008

Cao, W., Li, Y., Chen, X., Chang, Y., Li, L., Shi, L., Bai, W., Ye, L., 2020. Species identification and quantification of silver pomfret using the droplet digital PCR assay. Food Chem. 302, 125331. https://doi.org/10.1016/j.foodchem.2019.125331

Cavé, L., Brothier, E., Abrouk, D., Bouda, P.S., Hien, E., Nazaret, S., 2016. Efficiency and sensitivity of the digital droplet PCR for the quantification of antibiotic resistance genes in soils and organic residues. Appl. Microbiol. Biotechnol. 100, 10597–10608. https://doi.org/10.1007/s00253-016-7950-5

Cooley, M.B., Carychao, D., Gorski, L., 2018. Optimized Co-extraction and Quantification of DNA From Enteric Pathogens in Surface Water Samples Near Produce Fields in California. Front. Microbiol. 9, 448. https://doi.org/10.3389/fmicb.2018.00448

Cottenet, G., Blancpain, C., Chuah, P.F., 2019. Performance assessment of digital PCR for the quantification of GM-maize and GM-soya events. Anal. Bioanal. Chem. 411, 2461–2469. https://doi.org/10.1007/s00216-019-01692-7

Cremonesi, P., Cortimiglia, C., Picozzi, C., Minozzi, G., Malvisi, M., Luini, M., Castiglioni, B., 2016. Development of a Droplet Digital Polymerase Chain Reaction for Rapid and Simultaneous Identification of Common Foodborne Pathogens in Soft Cheese. Front. Microbiol. 7, 1725. https://doi.org/10.3389/fmicb.2016.01725

Demeke, T., Holigroski, M., Eng, M., Xing, J., 2016. Absolute quantification of genetically engineered traits with droplet digital PCR: Effect of DNA treatments and spiking with non-target DNA. Food Control 68, 105–111. https://doi.org/10.1016/j.foodcont.2016.03.007

Deng, T., Huang, W., Ren, J., Ma, X., Ge, Y., Chen, Y., 2019. Verification and applicability of endogenous reference genes for quantifying GM rice by digital PCR. Anal. Biochem. 587, 113442. https://doi.org/10.1016/j.ab.2019.113442

Dobnik, D., Štebih, D., Blejec, A., Morisset, D., Žel, J., 2016. Multiplex quantification of four DNA targets in one reaction with Bio-Rad droplet digital PCR system for GMO detection. Sci. Rep. 6, 1–9. https://doi.org/10.1038/srep35451

Doi, H., Takahara, T., Minamoto, T., Matsuhashi, S., Uchii, K., Yamanaka, H., 2015a. Droplet digital polymerase chain reaction (PCR) outperforms real-time PCR in the detection of environmental DNA from an invasive fish species. Environ. Sci. Technol. 49, 5601–5608. https://doi.org/10.1021/acs.est.5b00253

Doi, H., Uchii, K., Takahara, T., Matsuhashi, S., Yamanaka, H., Minamoto, T., 2015b. Use of droplet digital PCR for estimation of fish abundance and biomass in environmental DNA surveys. PLoS One 10. https://doi.org/10.1371/journal.pone.0122763

Fu, W., Wang, C., Zhu, P., Xu, W., Li, X., Zhu, S., 2020. A universal analytical approach for screening and monitoring of authorized and unauthorized GMOs. LWT 125. https://doi.org/10.1016/j.lwt.2020.109176

Gao, H., Yu, X., Deng, T., Sun, M., Xiao, X., Huang, X., Chen, Y., Li, R., 2016. Event-specific detection of transgenic potato AV43-6-G7 using real-time and digital PCR methods. BMC Biotechnol. 16, 74. https://doi.org/10.1186/s12896-016-0303-8

Gao, M., Qiu, T., Sun, Y., Wang, X., 2018. The abundance and diversity of antibiotic resistance genes in the atmospheric environment of composting plants. Environ. Int. 116, 229–238. https://doi.org/10.1016/j.envint.2018.04.028

Giraldo, P.A., Cogan, N.O.I., Spangenberg, G.C., Smith, K.F., Shinozuka, H., 2019. Development and application of droplet digital PCR tools for the detection of transgenes in pastures and pasture-based products. Front. Plant Sci. 9. https://doi.org/10.3389/fpls.2018.01923

Gobert, G., Cotillard, A., Fourmestraux, C., Pruvost, L., Miguet, J., Boyer, M., 2018. Droplet digital PCR improves absolute quantification of viable lactic acid bacteria in faecal samples. J. Microbiol. Methods 148, 64–73. https://doi.org/10.1016/j.mimet.2018.03.004

Gradoville, M.R., Crump, B.C., Häse, C.C., White, A.E., 2018. Environmental Controls of Oyster-Pathogenic Vibrio spp. in Oregon Estuaries and a Shellfish Hatchery. Appl. Environ. Microbiol. 84, e02156-17. https://doi.org/10.1128/aem.02156-17

Grelewska-Nowotko, K., Żurawska-Zajfert, M., Żmijewska, E., Sowa, S., 2018. Optimization and Verification of Droplet Digital PCR Even-Specific Methods for the Quantification of GM Maize DAS1507 and NK603. Appl. Biochem. Biotechnol. 185, 207–220. https://doi.org/10.1007/s12010-017-2634-x

Grudlewska-Buda, K., Skowron, K., Gospodarek-Komkowska, E., 2020. Comparison of the intensity of biofilm formation by Listeria monocytogenes using classical culture-based method and digital droplet PCR. AMB Express 10. https://doi.org/10.1186/s13568-020-01007-5

Hamaguchi, M., Shimabukuro, H., Hori, M., Yoshida, G., Terada, T., Miyajima, T., 2018. Quantitative real-time polymerase chain reaction (PCR) and droplet digital PCR duplex assays for detecting Zostera marina DNA in coastal sediments. Limnol. Oceanogr. Methods 16, 253–264. https://doi.org/10.1002/lom3.10242

Hunter, M.E., Dorazio, R.M., Butterfield, J.S.S., Meigs-Friend, G., Nico, L.G., Ferrante, J.A., 2017. Detection limits of quantitative and digital PCR assays and their influence in presence–absence surveys of environmental DNA. Mol. Ecol. Resour. 17, 221–229. https://doi.org/10.1111/1755-0998.12619

Iwobi, A., Gerdes, L., Busch, U., Pecoraro, S., 2016. Droplet digital PCR for routine analysis of genetically modified foods (GMO) - A comparison with real-time quantitative PCR. Food Control 69, 205–213. https://doi.org/10.1016/j.foodcont.2016.04.048

Jerde, C.L., Olds, B.P., Shogren, A.J., Andruszkiewicz, E.A., Mahon, A.R., Bolster, D., Tank, J.L., 2016. Influence of Stream Bottom Substrate on Retention and Transport of Vertebrate Environmental DNA. Environ. Sci. Technol. 50, 8770–8779. https://doi.org/10.1021/acs.est.6b01761

Kelley, K.S., Cosman, A., Belgrader, P., Chapman, B., Sullivan, D.C., 2013. Detection of methicillin-resistant Staphylococcus aureus by a duplex droplet digital PCR assay. J. Clin. Microbiol. 51, 2033–2039. https://doi.org/10.1128/JCM.00196-13

Kim, T.G., Jeong, S.Y., Cho, K.S., 2014. Comparison of droplet digital PCR and quantitative real-time PCR for examining population dynamics of bacteria in soil. Appl. Microbiol. Biotechnol. 98, 6105–6113. https://doi.org/10.1007/s00253-014-5794-4

King, J.L., Smith, A.D., Mitchell, E.A., Allen, M.S., 2017. Validation of droplet digital PCR for the detection and absolute quantification of Borrelia DNA in Ixodes scapularis ticks. Parasitology 144, 359–367. https://doi.org/10.1017/S0031182016001864

Köppel, R., Thomas Bucher, ·, Bär, D., Franziska Van Velsen, ·, Ganeshan, A., 2018. Validation of 13 duplex droplet digital PCR systems for quantitative GMO analysis of most prevalent GMO traits 244, 313–321. https://doi.org/10.1007/s00217-017-2957-4

Köppel, R., Ganeshan, A., Weber, S., Pietsch, K., Graf, C., Hochegger, R., Griffiths, K., Burkhardt, S., 2019. Duplex digital PCR for the determination of meat proportions of sausages containing meat from chicken, turkey, horse, cow, pig and sheep. Eur. Food Res. Technol. 245, 853–862. https://doi.org/10.1007/s00217-018-3220-3

Košir, A.B., Spilsberg, B., Holst-Jensen, A., Žel, J., Dobnik, D., 2017. Development and inter-laboratory assessment of droplet digital PCR assays for multiplex quantification of 15 genetically modified soybean lines. Sci. Rep. 7. https://doi.org/10.1038/s41598-017-09377-w

Lee, H.G., Kim, H.M., Min, J., Kim, K., Park, M.G., Jeong, H.J., Kim, K.Y., 2017. An advanced tool, droplet digital PCR (DdPCR), for absolute quantification of the red-tide dinoflagellate, Cochlodinium polykrikoides Margalef (Dinophyceae). Algae 32, 189–197. https://doi.org/10.4490/algae.2017.32.9.10

Lievens, A., Jacchia, S., Kagkli, D., Savini, C., Querci, M., 2016. Measuring Digital PCR Quality: Performance Parameters and Their Optimization. https://doi.org/10.1371/journal.pone.0153317

Maheshwari, Y., Selvaraj, V., Hajeri, S., Yokomi, R., 2017. Application of droplet digital PCR for quantitative detection of Spiroplasma citri in comparison with real time PCR. PLoS One 12. https://doi.org/10.1371/journal.pone.0184751

Mauvisseau, Q., Davy-Bowker, J., Bulling, M., Brys, R., Neyrinck, S., Troth, C., Sweet, M., 2019. Combining ddPCR and environmental DNA to improve detection capabilities of a critically endangered freshwater invertebrate. Sci. Rep. 9. https://doi.org/10.1038/s41598-019-50571-9

McMahon, T.C., Blais, B.W., Wong, A., Carrillo, C.D., 2017. Multiplexed single intact cell droplet digital PCR (MuSIC ddPCR) method for specific detection of enterohemorrhagic E. coli (EHEC) in food enrichment cultures. Front. Microbiol. 8. https://doi.org/10.3389/fmicb.2017.00332

Morisset, D., Štebih, D., Milavec, M., Gruden, K., Žel, J., 2013. Quantitative Analysis of Food and Feed Samples with Droplet Digital PCR. PLoS One 8. https://doi.org/10.1371/journal.pone.0062583

Naaum, A.M., Shehata, H.R., Chen, S., Li, J., Tabujara, N., Awmack, D., Lutze-Wallace, C., Hanner, R., 2018. Complementary molecular methods detect undeclared species in sausage products at retail markets in Canada. Food Control 84, 339–344. https://doi.org/10.1016/j.foodcont.2017.07.040

Nathan, L.M., Simmons, M., Wegleitner, B.J., Jerde, C.L., Mahon, A.R., 2014. Quantifying environmental DNA signals for aquatic invasive species across multiple detection platforms. Environ. Sci. Technol. 48, 12800–12806. https://doi.org/10.1021/es5034052

Palumbo, J.D., O’Keeffe, T.L., Fidelibus, M.W., 2016. Characterization of *Aspergillus* section *Nigri* species populations in vineyard soil using droplet digital PCR. Lett. Appl. Microbiol. 63, 458–465. https://doi.org/10.1111/lam.12667

Palumbo, Jeffrey D., O’keeffe, T.L., Ho, Y.S., Fidelibus, M.W., 2016. Population dynamics of aspergillus section Nigri species on vineyard samples of grapes and raisins. J. Food Prot. 79, 448–453. https://doi.org/10.4315/0362-028X.JFP-15-437

Paquette, S.J., Stanford, K., Thomas, J., Reuter, T., 2018. Quantitative surveillance of Shiga toxins 1 and 2, Escherichia coli O178 and O157 in feces of western-Canadian slaughter cattle enumerated by droplet digital PCR with a focus on seasonality and slaughterhouse location. PLoS One 13. https://doi.org/10.1371/journal.pone.0195880

Paternò, A., Verginelli, D., Bonini, P., Misto, M., Quarchioni, C., Dainese, E., Peddis, S., Fusco, C., Vinciguerra, D., Marchesi, U., 2018. In-House Validation and Comparison of Two Wheat (Triticum aestivum) Taxon-Specific Real-Time PCR Methods for GMO Quantification Supported by Droplet Digital PCR. Food Anal. Methods 11, 1281–1290. https://doi.org/10.1007/s12161-017-1097-6

Pérez-López, E., Rodríguez-Martínez, D., Olivier, C.Y., Luna-Rodríguez, M., Dumonceaux, T.J., 2017. Molecular diagnostic assays based on cpn60 UT sequences reveal the geographic distribution of subgroup 16SrXIII-(A/I)I phytoplasma in Mexico. Sci. Rep. 7. https://doi.org/10.1038/s41598-017-00895-1

Perry, D.J., Lee, S.J., 2017. Droplet digital PCR for verification of interspersed refuge in midge tolerant wheat varietal blends. Can. J. Plant Sci. 97, 257–265. https://doi.org/10.1139/cjps-2016-0223

Porcellato, D., Narvhus, J., Skeie, S.B., 2016. Detection and quantification of Bacillus cereus group in milk by droplet digital PCR. J. Microbiol. Methods 127, 1–6. https://doi.org/10.1016/j.mimet.2016.05.012

Rački, N., Dreo, T., Gutierrez-Aguirre, I., Blejec, A., Ravnikar, M., 2014. Reverse transcriptase droplet digital PCR shows high resilience to PCR inhibitors from plant, soil and water samples. Plant Methods 10, 42. https://doi.org/10.1186/s13007-014-0042-6

Ren, J., Deng, T., Huang, W., Chen, Y., Ge, Y., 2017. A digital PCR method for identifying and quantifying adulteration of meat species in raw and processed food. PLoS One 12. https://doi.org/10.1371/journal.pone.0173567

Roberts, C.H., Last, A., Molina-Gonzalez, S., Cassama, E., Butcher, R., Nabicassa, M., McCarthy, E., Burr, S.E., Mabey, D.C., Bailey, R.L., Holland, M.J., 2013. Development and evaluation of a next-generation digital PCR diagnostic assay for ocular Chlamydia trachomatis infections. J. Clin. Microbiol. 51, 2195–2203. https://doi.org/10.1128/JCM.00622-13

Selvaraj, V., Maheshwari, Y., Hajeri, S., Chen, J., McCollum, T.G., Yokomi, R., 2018. Development of a duplex droplet digital PCR assay for absolute quantitative detection of “candidatus liberibacter asiaticus.” PLoS One 13. https://doi.org/10.1371/journal.pone.0197184

Shehata, H.R., Li, J., Chen, S., Redda, H., Cheng, S., Tabujara, N., Li, H., Warriner, K., Hanner, R., 2017. Droplet digital polymerase chain reaction (ddPCR) assays integrated with an internal control for quantification of bovine, porcine, chicken and turkey species in food and feed. PLoS One 12. https://doi.org/10.1371/journal.pone.0182872

Shehata, H.R., Naaum, A.M., Chen, S., Murphy, T., Li, J., Shannon, K., Awmack, D., Locas, A., Hanner, R.H., 2019. Re-visiting the occurrence of undeclared species in sausage products sold in Canada. Food Res. Int. 122, 593–598. https://doi.org/10.1016/j.foodres.2019.01.030

Simmons, M., Tucker, A., Chadderton, W.L., Jerde, C.L., Mahon, A.R., 2016. Active and passive environmental DNA surveillance of aquatic invasive species. Can. J. Fish. Aquat. Sci. 73, 76–83. https://doi.org/10.1139/cjfas-2015-0262

Singh, G., Sithebe, A., Enitan, A.M., Kumari, S., Bux, F., Stenström, T.A., 2017. Comparison of droplet digital PCR and quantitative PCR for the detection of Salmonella and its application for river sediments. J. Water Health 15, 505–508. https://doi.org/10.2166/wh.2017.259

Steele, J.A., Blackwood, A.D., Griffith, J.F., Noble, R.T., Schiff, K.C., 2018. Quantification of pathogens and markers of fecal contamination during storm events along popular surfing beaches in San Diego, California. Water Res. 136, 137–149. https://doi.org/10.1016/j.watres.2018.01.056

Suttner, B., Johnston, E.R., Orellana, L.H., Rodriguez-R, L.M., Hatt, J.K., Carychao, D., Carter, M.Q., Cooley, M.B., Konstantinidis, K.T., 2020. Metagenomics as a public health risk assessment tool in a study of natural creek sediments influenced by agricultural and livestock runoff: Potential and limitations. Appl. Environ. Microbiol. 86, 2525–2544. https://doi.org/10.1128/AEM.02525-19

Te, S.H., Chen, E.Y., Gin, K.Y.-H., 2015. Comparison of Quantitative PCR and Droplet Digital PCR Multiplex Assays for Two Genera of Bloom-Forming Cyanobacteria, Cylindrospermopsis and Microcystis. Appl. Environ. Microbiol. 81, 5203–5211. https://doi.org/10.1128/aem.00931-15

Wang, Q., Cai, Y., He, Y., Yang, L., Li, J., Pan, L., 2018. Droplet digital PCR (ddPCR) method for the detection and quantification of goat and sheep derivatives in commercial meat products. Eur. Food Res. Technol. 244, 767–774. https://doi.org/10.1007/s00217-017-3000-5

Yang, R., Abraham, S., Gardner, G., Ryan, U., Jacobson, C., 2017. Prevalence and pathogen load of *Campylobacter* spp., *Salmonella enterica* and *Escherichia coli* O157/O145 serogroup in sheep faeces collected at sale yards and in abattoir effluent in Western Australia. Aust. Vet. J. 95, 143–148. https://doi.org/10.1111/avj.12572

Yang, R., Paparini, A., Monis, P., Ryan, U., 2014. Comparison of next-generation droplet digital PCR (ddPCR) with quantitative PCR (qPCR) for enumeration of Cryptosporidium oocysts in faecal samples. Int. J. Parasitol. 44, 1105–1113. https://doi.org/10.1016/j.ijpara.2014.08.004

Yang, Y., Cheng, D., Li, Y., Yu, L., Gin, K.Y.H., Chen, J.P., Reinhard, M., 2017. Effects of monochloramine and hydrogen peroxide on the bacterial community shifts in biologically treated wastewater. Chemosphere 189, 399–406. https://doi.org/10.1016/j.chemosphere.2017.09.087

Zhao, Y., Xia, Q., Yin, Y., Wang, Z., 2016. Comparison of Droplet Digital PCR and Quantitative PCR Assays for Quantitative Detection of Xanthomonas citri Subsp. citri. PLoS One 11, e0159004. https://doi.org/10.1371/journal.pone.0159004

ZHONG, X., LIU, X. lu, LOU, B. hai, ZHOU, C. yong, WANG, X. feng, 2018. Development of a sensitive and reliable droplet digital PCR assay for the detection of ‘Candidatus Liberibacter asiaticus.’ J. Integr. Agric. 17, 483–487. https://doi.org/10.1016/S2095-3119(17)61815-X

Zink, F.A., Tembrock, L.R., Timm, A.E., Farris, R.E., Perera, O.P., Gilligan, T.M., 2017. A droplet digital PCR (ddPCR) assay to detect Helicoverpa armigera (Lepidoptera: Noctuidae) in bulk trap samples. PLoS One 12, e0178704. https://doi.org/10.1371/journal.pone.0178704
